# Supplementary material for: β-Glucan Chitosan Particle Provides Cross-Protection Against Multi-Drug- Resistant Candida auris
Source: Research Square preprint supplement (doi:10.21203/rs.3.rs-7942966/v1), 2025-11-24
Supplement: Supplementary file 1 [file 612fde8ad11a5228abf74ebb.docx]

**Supplementary Figures**

**Figure S1. GCP vaccination does not protect mice against hematogenously disseminated *C. albicans* infection.**4-6 weeks old male ICR CD-1 mice were vaccinated with 200 µg/mouse of GCP or placebo (PBS, diluent) on days 0 and 21. The mice were infected with a lethal dose (2 × 105 cells/mouse) of *C. albicans* through tail vein injections on day 35 and observed for 21 days for their survival. Survival data were plotted and analyzed by the Mantel-Cox survival analysis. The p-values <0.05 were considered significant.

**Figure S2. GCP therapeutic vaccination do not protects mice against hematogenously disseminated *C. auris* infection.**4-6 weeks old naïve male ICR CD-1 mice were immunosuppressed with 200 mg/kg cyclophosphamide (I.P.) and 250 mg/kg cortisone acetate (S.C.), followed by infection with lethal dose (2 × 107 cells/mouse) of *C. auris* through tail vein injections after two days. These mice were divided in three groups and administered with single (day 1) or two (days 1 and 8) doses of 200 µg GCP/mouse (S.C.) or placebo (PBS diluent). Survival data were plotted and analyzed by the Mantel-Cox survival analysis. The p-values <0.05 were considered significant.
